# Supplementary material for: Release of TiO2nanoparticles from painted surfaces in cold climates: characterization using a high sensitivity single-particle ICP-MS
Source: Royal Society of Chemistry journal article supplement (doi:10.1039/c9en00951e), 2019-12-19
Supplement: c9en00951e1.pdf [file c9en00951e1.pdf]

## Supplementary Information

# Release of TiO<sub>2</sub> nanoparticles from painted surfaces in cold climates: characterization using a high sensitivity single-particle ICP-MS

Submitted to:

Environmental Science: Nano

AGIL AZIMZADA<sup>1,2</sup>, JEFFREY M. FARNER<sup>2</sup>, MADJID HADIOUI<sup>1</sup>,  
CAROLYN LIU-KANG<sup>1</sup>, IBRAHIM JREIJE<sup>1</sup>, NATHALIE  
TUFENKJI<sup>2</sup>, and KEVIN J. WILKINSON<sup>1</sup>

<sup>1</sup>Department of Chemistry, University of Montreal

Montreal, Quebec H3C 3J7, Canada

<sup>2</sup>Department of Chemical Engineering, McGill University

Montreal, Quebec H3A 0C5, Canada

\* Corresponding Author. Phone: +1 (514) 343-6741; Fax: +1 (514) 343-7586; E-mail: [kj.wilkinson@umontreal.ca](mailto:kj.wilkinson@umontreal.ca)

**Optimization of SP-ICP-MS for TiO<sub>2</sub> NPs.** Since the lowest size that can be detected (*i.e.* SDL) is inversely related to the ratio of signal (S) to background (B) ( $SDL=f(B/S)^{1/3}$ ), SDL will increase with increasing complexity of the matrix and is particularly high in the environmental media, where <sup>48</sup>Ca, S, N and O (*i.e.* S-N, S-O polyatomic interferences) concentrations are important.<sup>1, 2</sup> Indeed, SDL of 50-100 nm are generally reported for TiO<sub>2</sub> NPs.<sup>3-6</sup> Therefore, several strategies were employed to improve the ratio of signal-to-noise (background) and thereby lower the SDL<sup>7</sup>: (i) a high sensitivity magnetic-sector ICP-MS was used rather than a quadrupole ICP-MS; (ii) interferences were minimized by analyzing an isotope, Ti-49, that had relatively few interferences in natural matrices, and (iii) very small dwell times (50 μs) were employed, which helped further reduce the background and yield well-defined NP peaks. In addition, discrimination of NP from the background signal used a powerful peak recognition algorithm that took into account the local background variations and facilitated identification of peak artifacts. Raw data showing peaks near the SDL were visually monitored to ensure that each peak consisted of at least 4 integration points (*i.e.* minimum peak width of 200 μs). Further details on the technique and data processing can be found in our previous work<sup>7</sup>.

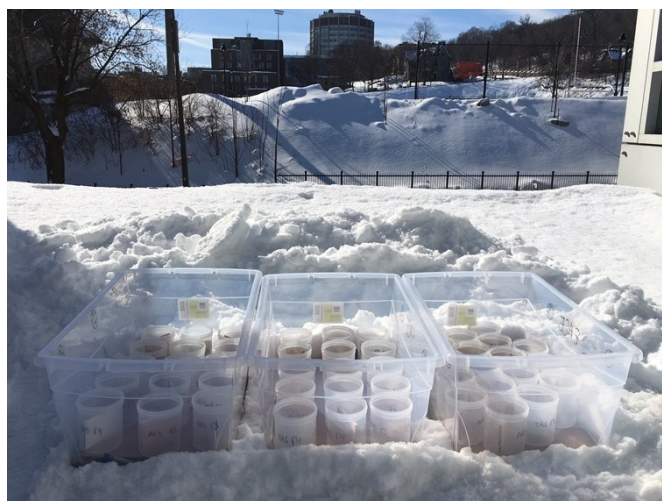

**Figure S1.** A photo of the outdoor weathering setup on the 4<sup>th</sup> floor roof of Wong building (McGill University, Montreal, QC). The photo was taken on the start day of winter weathering experiments, February 13, 2018.

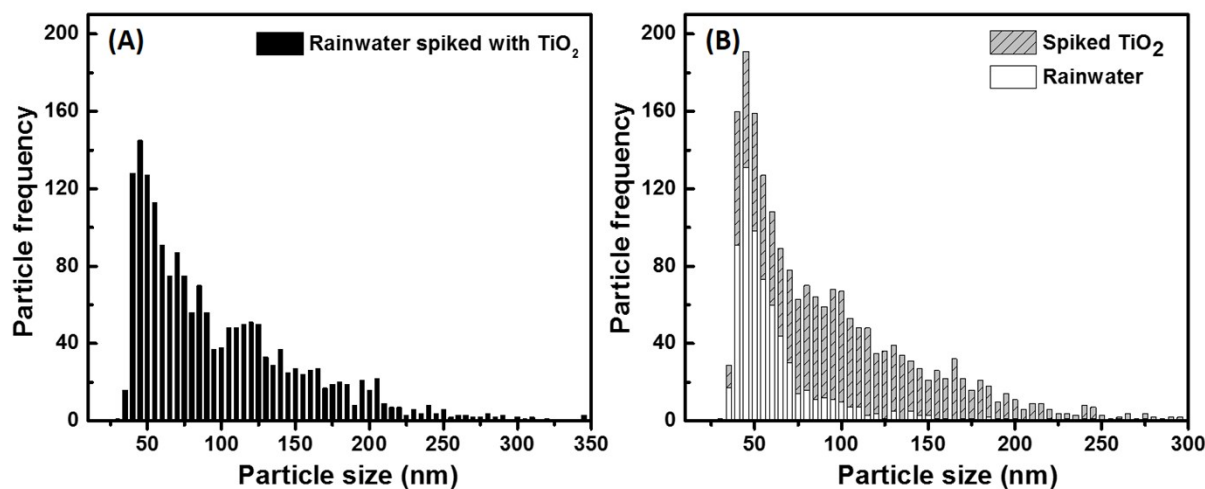

**Figure S2.** (A) Particle size distribution of  $\text{TiO}_2$  NPs (148,100 NP/mL) after spiking engineered  $\text{TiO}_2$  NPs (nominal size of 25 nm) into the rainwater medium, (B) Cumulative particle size distributions of  $\text{TiO}_2$  in the rainwater (54,640 NP/mL) and for the  $\text{TiO}_2$  NPs suspended in Milli-Q water (106,500 NP/mL) before mixing. Measurements were performed on a magnetic-sector ICP-MS. Particle diameter were calculated on the assumption that particles were solely  $\text{TiO}_2$ .

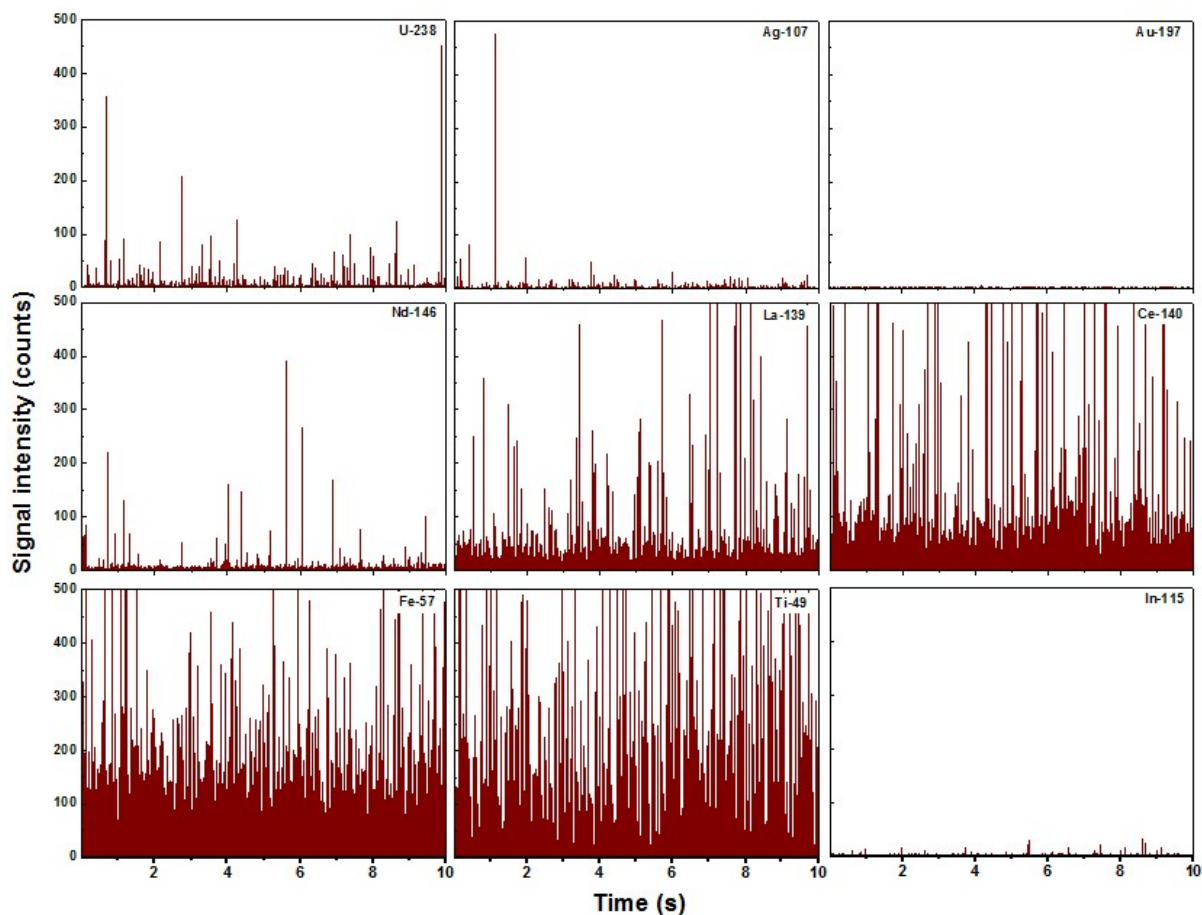

**Figure S3.** Time-resolved SP-ICP-MS signals (*i.e.* raw data) obtained for  $^{238}\text{U}$ ,  $^{107}\text{Ag}$ ,  $^{197}\text{Au}$ ,  $^{146}\text{Nd}$ ,  $^{139}\text{La}$ ,  $^{140}\text{Ce}$ ,  $^{57}\text{Fe}$ ,  $^{49}\text{Ti}$  and  $^{115}\text{In}$  in a filtered (0.45  $\mu\text{m}$ ) rainwater sample (collected in Montreal, QC). Data were acquired for a total of 10 s using a dwell time of 50  $\mu\text{s}$  on a magnetic-sector ICP-MS. Signal spikes indicate the presence of metallic particles.

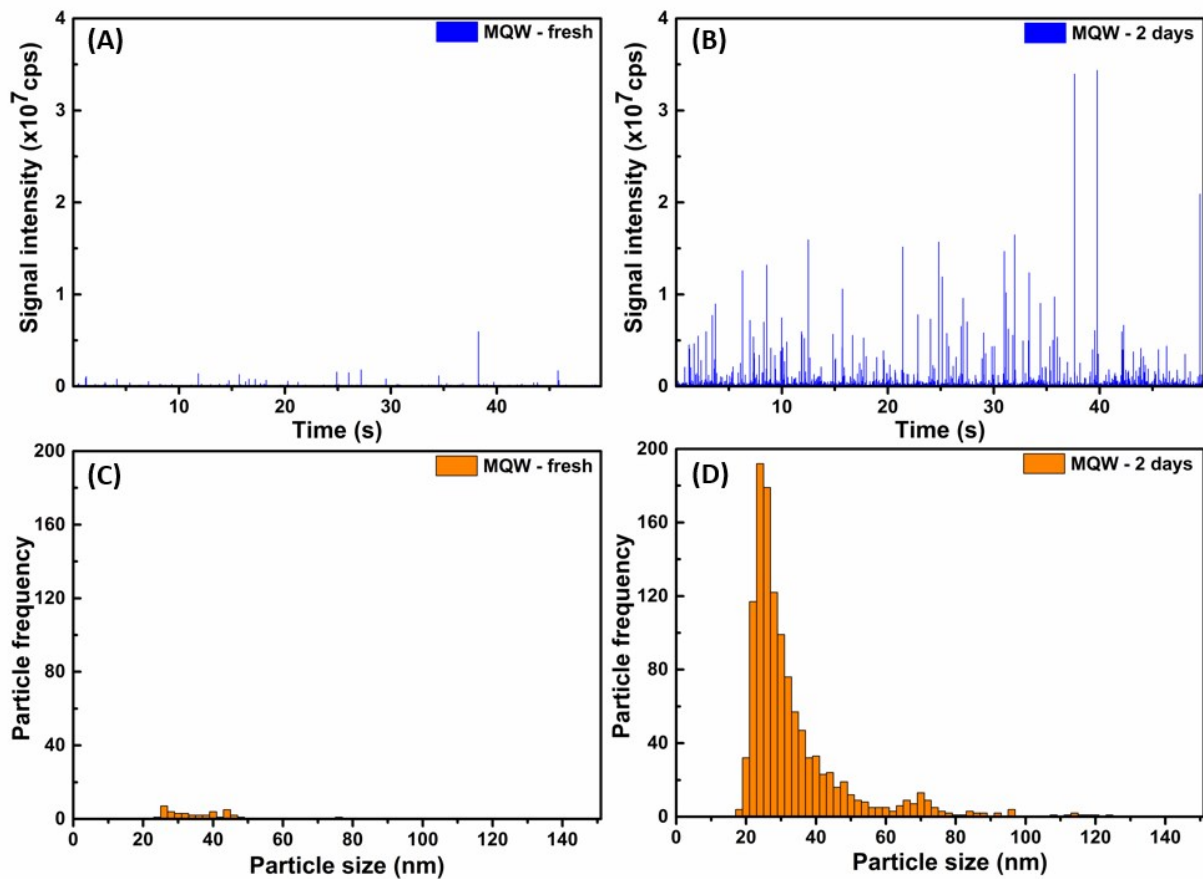

**Figure S4.** Time-resolved SP-ICP-MS signal obtained following the analysis of (A) fresh Milli-Q water and (B) Milli-Q water exposed to outdoor air for 2 days, as well as (C, D) their corresponding particle size distributions. Particle diameters were calculated on the assumption that particles were  $\text{TiO}_2$ .

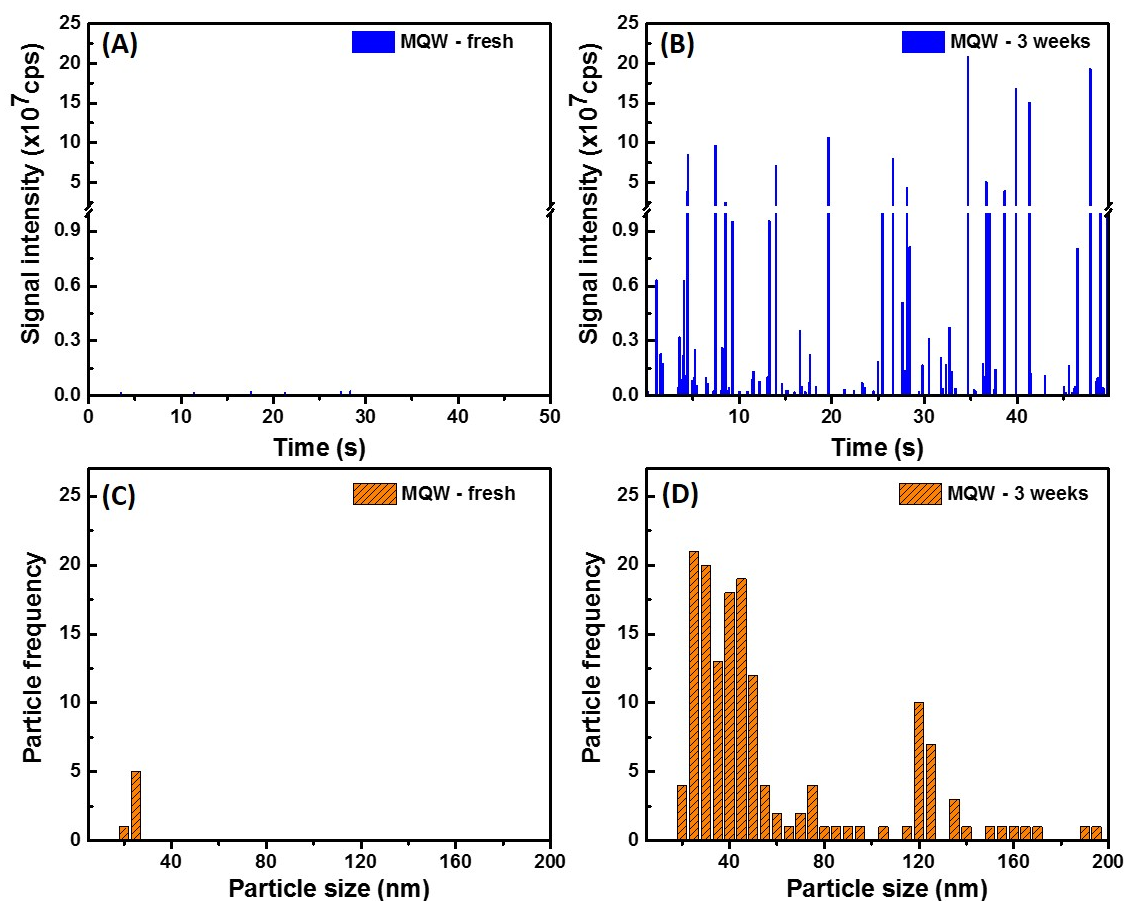

**Figure S5.** Time-resolved SP-ICP-MS signal obtained following the analysis of (A) fresh Milli-Q water and (B) Milli-Q water exposed to indoor air for 3 weeks, as well as (C, D) their corresponding particle size distributions. As opposed to the outdoor air, 3 weeks was required in order to get a non-negligible signal. Particle diameters were calculated on the assumption that particles were solely TiO<sub>2</sub>.

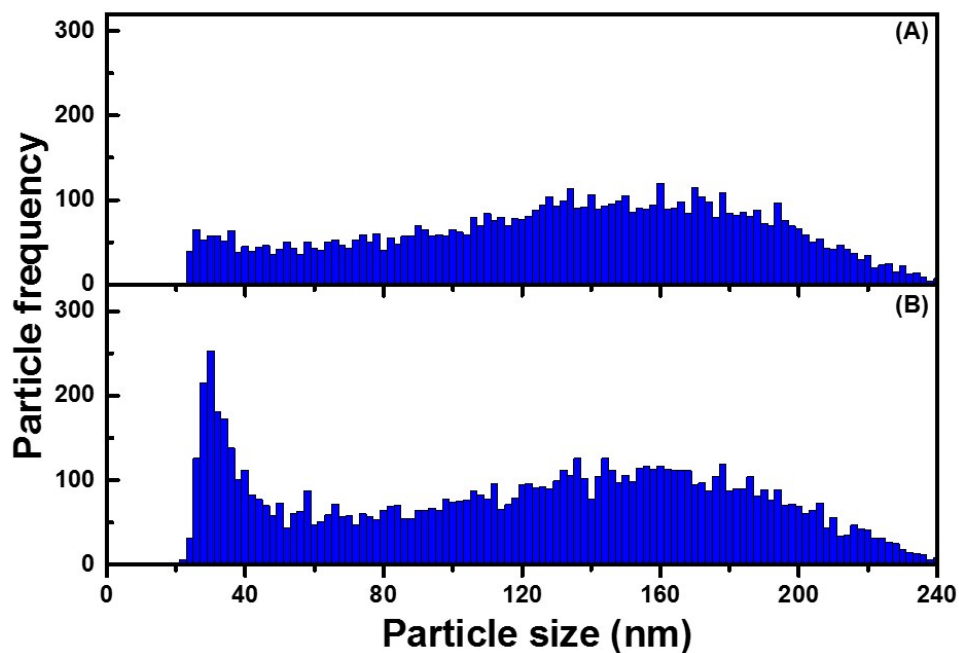

**Figure S6.** Particle size distributions obtained for TiO<sub>2</sub> NPs in a liquid paint sample diluted  $2 \times 10^7 \times$  w/w with (A) Milli-Q water and (B) 5 mg/L of fulvic acid (Suwannee River standard fulvic acid, SRFA II) following 30 min of ultrasonication. Particle diameters were calculated on the assumption that particles were solely TiO<sub>2</sub>.

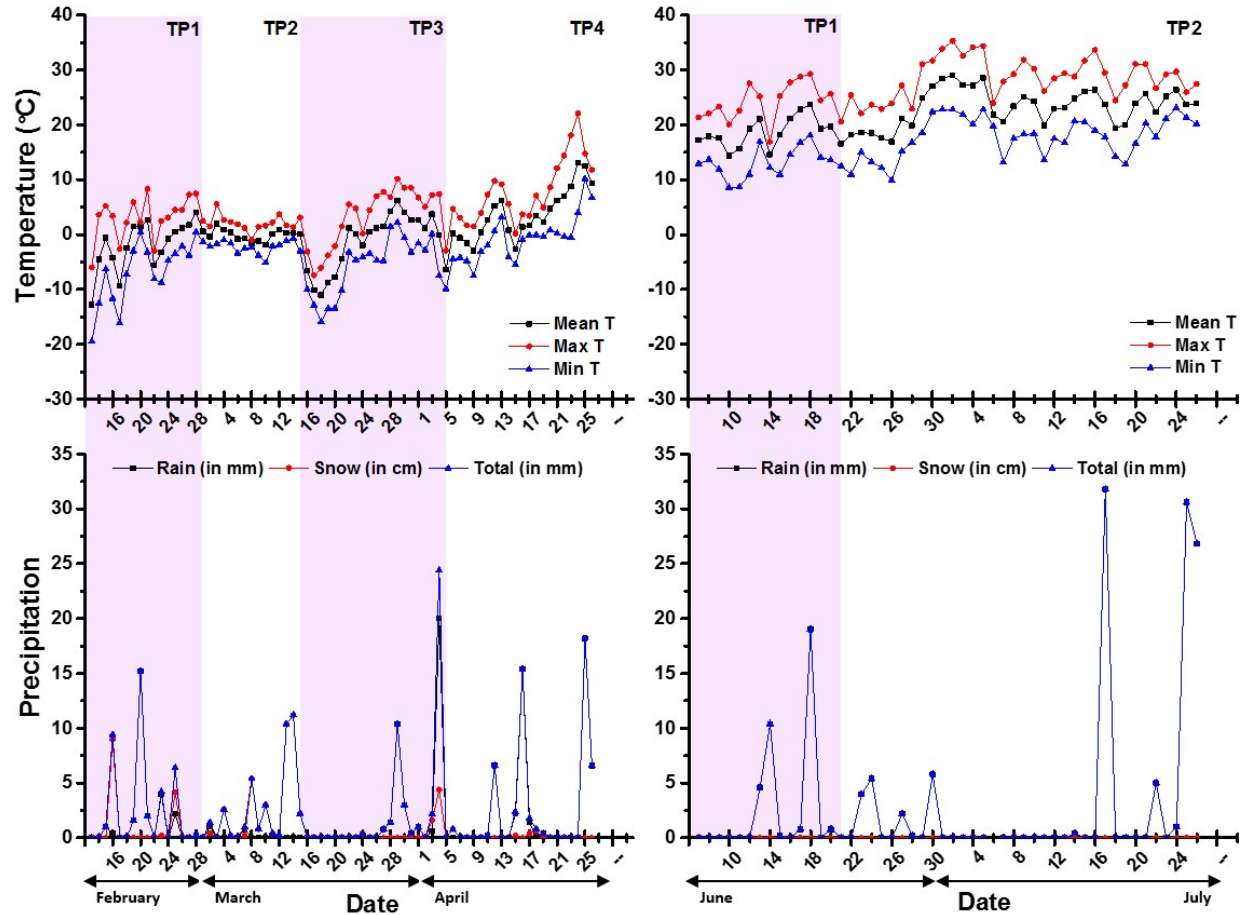

**Figure S7.** Daily temperatures (maxima, minima and mean T) as well as precipitation (rain, snow, total precipitation) in the winter and summer of 2018, as collected from Montreal International Airport weather station (45°28'14.000" N, 73°44'27.000" W) and retrieved from the Environment and Climate Change Canada database. Timepoints (TP) refer to the cumulative period in which the respective sample was taken.



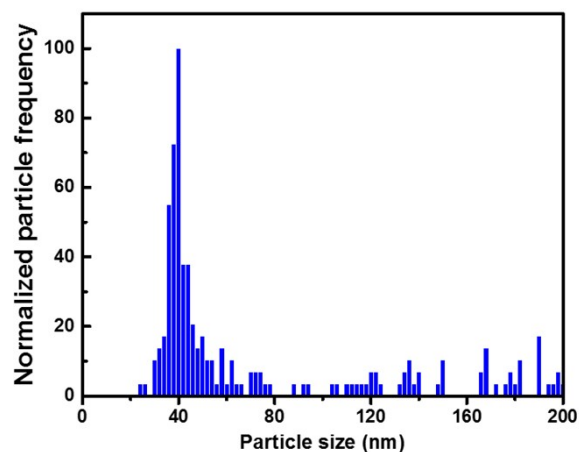

**Figure S8.** Particle size distribution of TiO<sub>2</sub> NPs released following a 4-day soaking of a painted panel in Milli-Q water (no NP background).

**Table S1.** Recoveries (%) of ionic Ti (based on Ti-49 isotope) as well as those of TiO<sub>2</sub> NPs spiked in a rainwater matrix. Given sizes are nominal particle diameters, as provided by the manufacturer.

|                              | Ionic recovery (%) |   |     |
|------------------------------|--------------------|---|-----|
| Ti - 1 ppb                   | 103.0              | ± | 1.6 |
| Ti - 5 ppb                   | 102.6              | ± | 0.8 |
| Ti - 10 ppb                  | 101.6              | ± | 1.0 |
|                              | NP recovery (%)    |   |     |
| TiO <sub>2</sub> NPs (25 nm) | 92.2               | ± | 2.0 |

## References

1. May, T. W.; Wiedmeyer, R. H., A table of polyatomic interferences in ICP-MS. *ATOMIC SPECTROSCOPY-NORWALK CONNECTICUT*- **1998**, *19*, 150-155.
2. Tharaud, M.; Gondikas, A. P.; Benedetti, M. F.; von der Kammer, F.; Hofmann, T.; Cornelis, G., TiO<sub>2</sub> nanomaterial detection in calcium rich matrices by spICPMS. A matter of resolution and treatment. *Journal of Analytical Atomic Spectrometry* **2017**, *32* (7), 1400-1411.
3. Gondikas, A. P.; Kammer, F. v. d.; Reed, R. B.; Wagner, S.; Ranville, J. F.; Hofmann, T., Release of TiO<sub>2</sub> nanoparticles from sunscreens into surface waters: a one-year survey at the old Danube recreational Lake. *Environmental Science & Technology* **2014**, *48* (10), 5415-5422.
4. Kaegi, R.; Englert, A.; Gondikas, A.; Sinnet, B.; von der Kammer, F.; Burkhardt, M., Release of TiO<sub>2</sub>-(Nano) particles from construction and demolition landfills. *NanoImpact* **2017**, *8*, 73-79.
5. Peters, R. J.; van Bommel, G.; Milani, N. B.; den Hertog, G. C.; Undas, A. K.; van der Lee, M.; Bouwmeester, H., Detection of nanoparticles in Dutch surface waters. *Science of the Total Environment* **2018**, *621*, 210-218.
6. Lee, S.; Bi, X.; Reed, R. B.; Ranville, J. F.; Herckes, P.; Westerhoff, P., Nanoparticle size detection limits by single particle ICP-MS for 40 elements. *Environmental Science & Technology* **2014**, *48* (17), 10291-10300.
7. Hadioui, M.; Knapp, G. v.; Azimzada, A.; Jreije, I.; Frechette-Viens, L.; Wilkinson, K. J. J. A. c., Lowering the size detection limits of Ag and TiO<sub>2</sub> nanoparticles by Single Particle ICP-MS. **2019**, *91* (20), 13275-13284.
